# Supplementary material
Source: PubMed Central journal article supplement (PMC3194956)
Supplement: supp_85_21_11502__1.pdf [file supp_85_21_11502__1.pdf]

# Supplementary Figure 1

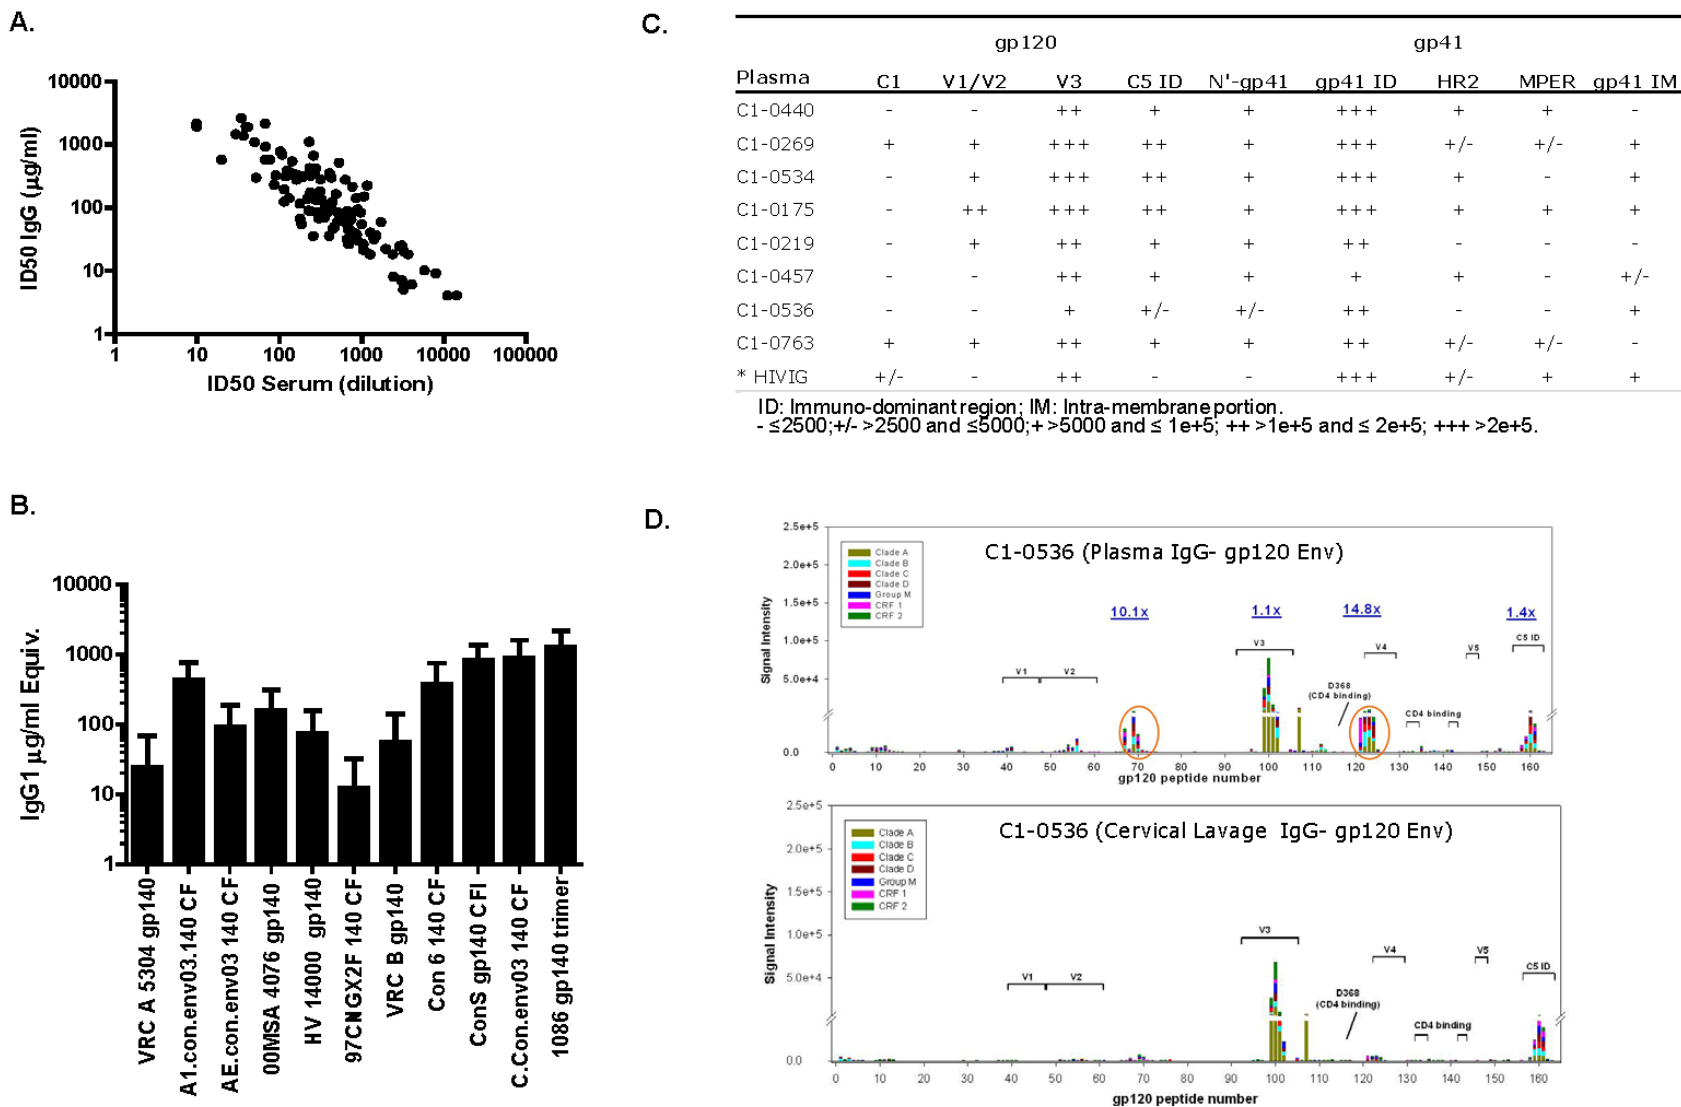

**SOM Figure 1: Purified plasma IgG and Plasma Neutralization and binding antibody Specificities.** A) Purified IgG from plasma was tested against a panel of 12 tier 2 viruses in neutralization assays. IC<sub>50</sub> titers were then plotted against ID<sub>50</sub> titers of the corresponding plasma tested against the same virus. B) IgG1 subclass distribution of multisubtype anti-Env binding antibodies was determined. C) Peptide microarray summary of the epitope specificity of purified IgG. D) Binding profiles of plasma IgG (tested at 40 µg/ml, and CVL (tested at 10 µg/ml) from C1-0536. Regions that showed differential binding levels between the two IgG species are circled in orange. Blue underlined numbers in the top panel indicate the fold differences between the signal intensities of the plasma and CVL IgGs to the peptide in that region that shows the strongest binding.
