# Supplementary material
Source: PubMed Central journal article supplement (PMC3194956)
Supplement: supp_85_21_11502__2.pdf [file supp_85_21_11502__2.pdf]

## Supplementary Figure 2

| mutant      | region | C1-0440 | C1-0269 | C1-0534 | C1-0175 | C1-0219 | C1-0457 | C1-0536 | C1-0763 | C8-0258 |
|-------------|--------|---------|---------|---------|---------|---------|---------|---------|---------|---------|
| ConC Parent |        | 394     | 1,137   | 557     | 841     | 1,286   | 1,151   | 325     | 11,407  | 96      |
| R132A       | V1     | 448     | 687     | 299     | 659     | 731     | 1,158   | 228     | 3,212   | 144     |
| S158A       | V2     | 474     | 1,059   | 570     | 1,188   | 1,896   | 1,409   | 383     | 12,637  | 101     |
| N160A       | V2     | 474     | 968     | 1,090   | 953     | 505     | 1,346   | 422     | 2,004   | 155     |
| R166A       | V2     | 347     | 1,063   | 495     | 761     | 804     | 1,205   | 398     | 5,885   | 109     |
| D167N       | V2     | 619     | 1,500   | 1,346   | 1,304   | 522     | 1,107   | 645     | 42,180  | 111     |
| K169E       | V2     | 268     | 831     | 431     | 614     | 327     | 1,081   | 449     | 2,196   | 112     |
| K171A       | V2     | 297     | 925     | 467     | 708     | 338     | 1,265   | 359     | 2,901   | 124     |
| A174G       | V2     | 616     | 1,266   | 833     | 1,084   | 1,259   | 1,211   | 324     | 7,476   | 131     |
| L175A       | V2     | 633     | 910     | 922     | 1,329   | 988     | 1,300   | 253     | 8,317   | 121     |
| Y177A       | V2     | 1,607   | 6,307   | 3,548   | 4,986   | 1,220   | 2,352   | 424     | 15,653  | 311     |
| I181A       | V2     | 1,101   | 2,222   | 3,588   | 3,705   | 843     | 1,965   | 1,026   | 7,132   | 298     |
| N332A       | C3     | 456     | 2,879   | 1,130   | 850     | 3,538   | 2,054   | 1,467   | 21,958  | 225     |
| S365I       | C3     | 4,392   | 7,801   | 6,618   | 6,951   | 3,696   | 4,493   | 6,201   | 25,467  | 589     |
| S375M       | C3     | 289     | 1,104   | 392     | 682     | 955     | 1,032   | 463     | 10,634  | 67      |
| V430A       | C4     | 1,619   | 3,600   | 2,007   | 3,374   | 2,545   | 2,454   | 1,113   | 17,595  | 490     |
| F468V       | V5     | 953     | 2,383   | 1,106   | 1,614   | 2,263   | 1,965   | 960     | 20,962  | 175     |
| G471E       | C5     | 690     | 1,765   | 703     | 1,346   | 1,556   | 2,762   | 742     | 15,035  | 86      |

**SOM Figure 2: Effects of gp120 point mutations on ConC neutralization.** The neutralizing titres of plasmas tested against a panel of viruses bearing trimers with gp120 mutants in the ConC background (additional experiments to that shown in Figure 8). Mutants that resulted in a >50% reduction in plasma neutralization titer are shown in red. Those that resulted in a two-fold or more increase in neutralization titer are shown in lavender. Amino acid numbering is based on the sequence of HXB2. Residue positions were color coded to reflect their degree of conservation across clades, as described previously (111). Positions that are conserved in 0-49% of isolates are shown in white, those conserved in 50-90% of isolates are shown in light blue and those conserved in >90% of isolates are shown in dark blue. Amino acid identity was determined based on a sequence alignment of HIV-1 isolates listed in the HIV sequence database at <http://hiv-web.lanl.gov/content/hiv-db/mainpage.html>.
