# Supplementary material
Source: PubMed Central journal article supplement (PMC3194956)
Supplement: supp_85_21_11502__3.pdf [file supp_85_21_11502__3.pdf]

# Supplementary Figure 3

| mutant       | region     | C1-0440 | C1-0269 | C1-0534 | C1-0175 | C1-0219 | C1-0457 | C1-0536 | C1-0763 | C8-0258 | 39F (V3) | b12   |
|--------------|------------|---------|---------|---------|---------|---------|---------|---------|---------|---------|----------|-------|
| JR-FL Parent |            | 130     | 100     | 130     | 150     | 600     | 110     | 140     | 325     | 125     | >30      | 0.01  |
| I154A        | V1         | 1,701   | N.D.    | 1,515   | N.D.    | 3,000   | 200     | N.D.    | 1,600   | 1,542   | 0.1      | 0.002 |
| N160A        | V1         | 170     | 150     | 120     | 300     | 625     | 200     | 120     | 412     | 180     | >20      | 0.009 |
| I165A        | V2         | 120     | 100     | 100     | N.D.    | 400     | 50      | 120     | 295     | 100     | >20      | 0.017 |
| R166A        | V2         | 232     | N.D.    | 293     | N.D.    | 290     | <50     | 120     | 225     | 157     | >20      | N.D.  |
| D167A        | V2         | 122     | N.D.    | 168     | N.D.    | 800     | 55      | N.D.    | 180     | 152     | >20      | 0.01  |
| D167N        | V2         | 120     | 70      | 140     | N.D.    | 550     | 70      | 130     | 300     | 120     | >20      | 0.01  |
| E168A        | V2         | 163     | N.D.    | 172     | N.D.    | 557     | 220     | N.D.    | 180     | 123     | >20      | N.D.  |
| E168K        | V2         | 120     | N.D.    | N.D.    | N.D.    | 1,100   | 100     | N.D.    | 250     | 175     | >20      | 0.009 |
| V169A        | V2         | 185     | N.D.    | 170     | N.D.    | 600     | 130     | N.D.    | 350     | 167     | >20      | 0.009 |
| Q170A        | V2         | 964     | 266     | 963     | N.D.    | 4,481   | 693     | N.D.    | 2,461   | 949     | >20      | 0.007 |
| K171A        | V2         | 230     | N.D.    | 163     | N.D.    | 440     | 80      | 100     | 180     | 225     | >20      | 0.009 |
| E172A        | V2         | 344     | N.D.    | 252     | N.D.    | 470     | 80      | 140     | 400     | 260     | 2        | N.D.  |
| D180A        | V2         | 5,000   | N.D.    | 6,000   | N.D.    | 2,000   | 700     | N.D.    | 3,200   | 6,000   | 3.2      | 0.008 |
| V182C        | V2         | 122     | N.D.    | 80      | N.D.    | 1,000   | 85      | N.D.    | 200     | 174     | >20      | 0.009 |
| I184A        | V2         | 140     | N.D.    | 200     | N.D.    | 450     | 90      | N.D.    | 350     | 240     | >20      | 0.008 |
| D185A        | V2         | 120     | N.D.    | N.D.    | N.D.    | 560     | 100     | 240     | 400     | 120     | >20      | 0.008 |
| D185N        | V2         | 145     | N.D.    | N.D.    | N.D.    | 900     | 110     | 160     | 600     | 127     | >20      | N.D.  |
| N186C        | V2         | 200     | N.D.    | 320     | N.D.    | 690     | 160     | N.D.    | 450     | 280     | >20      | 0.005 |
| N187C        | V2         | 160     | N.D.    | 240     | N.D.    | 450     | 80      | N.D.    | 400     | 240     | >20      | 0.006 |
| S190C        | V2         | 310     | N.D.    | N.D.    | N.D.    | 2,000   | 320     | N.D.    | 1,600   | 239     | >20      | 0.003 |
| S195C        | V2         | 320     | N.D.    | N.D.    | N.D.    | 830     | 116     | N.D.    | 767     | 116     | >20      | 0.003 |
| D197K        | V2         | 250     | N.D.    | 400     | N.D.    | 1,000   | 200     | N.D.    | 800     | 420     | >20      | 0.006 |
| D197N        | V2         | 645     | N.D.    | N.D.    | N.D.    | 800     | 350     | 640     | 1,200   | 794     | >20      | 0.004 |
| T198S        | V2         | 80      | N.D.    | 140     | N.D.    | 500     | 160     | N.D.    | 200     | 100     | >20      | 0.006 |
| N276A        | C2/V3 BASE | 150     | 107     | N.D.    | N.D.    | 862     | 567     | 150     | 300     | 101     | >20      | N.D.  |
| N295A        | C2/V3 BASE | 150     | 140     | 320     | 320     | 550     | 190     | 500     | 350     | 75      | >20      | N.D.  |
| R304A        | V3 N term  | 150     | N.D.    | N.D.    | N.D.    | 176     | 84      | N.D.    | 310     | 80      | N.D.     | 0.01  |
| E320A        | V3 C term  | 132     | N.D.    | 83      | N.D.    | 400     | 65      | 90      | 110     | 220     | >20      | 0.048 |
| G323C        | V3 C term  | 557     | N.D.    | 210     | N.D.    | 3,200   | 104     | N.D.    | 55      | 236     | >20      | 0.005 |
| D324A        | V3 C term  | 191     | N.D.    | 106     | N.D.    | 530     | 81      | N.D.    | 40      | 390     | >20      | 0.013 |
| Q327A        | V3 C term  | 130     | N.D.    | 74      | N.D.    | 630     | 70      | 80      | 200     | 281     | >20      | 0.013 |
| H329A        | V3 C term  | 145     | N.D.    | 358     | N.D.    | 550     | 70      | 60      | 250     | 300     | >20      | 0.023 |
| N332A        | C3         | 140     | 150     | 150     | 170     | 856     | 130     | 155     | 115     | 220     | >20      | N.D.  |
| N339A        | C3         | 130     | 75      | 90      | 55      | 600     | 117     | 130     | 400     | 110     | >20      | 0.011 |
| S375W        | C3         | 120     | N.D.    | 302     |         | 330     | 65      | 120     | 200     | 161     | >20      | 0.014 |
| Y384A        | C3         | 1,500   | N.D.    | N.D.    | N.D.    | 2,000   | 95      | 1,300   | 3,200   | 1,600   | 5        | N.D.  |
| N386A        | C3         | 229     | 100     | N.D.    | N.D.    | 1,100   | 137     | N.D.    | 438     | 188     | >20      | N.D.  |
| N412A        | V4         | 160     | N.D.    | N.D.    | N.D.    | 600     | 80      | N.D.    | 300     | 130     | >20      | 0.006 |
| T413A        | V4         | 320     | N.D.    | N.D.    | N.D.    | 800     | 320     | N.D.    | 600     | 320     | >20      | 0.002 |
| R419A        | C4         | 640     | N.D.    | N.D.    | N.D.    | 900     | 120     | N.D.    | 1200    | 380     | >20      | 0.004 |
| I420R        | C4         | N.D.    | N.D.    | N.D.    | N.D.    | 1,600   | 480     | 1,000   | 3,200   | N.D.    | 1.6      | N.D.  |
| K421A        | C4         | 3,200   | N.D.    | N.D.    | N.D.    | 6,400   | 1,600   | N.D.    | 5,000   | 3,200   | 1.7      | 0.005 |
| K432G        | C4         | N.D.    | N.D.    | N.D.    | N.D.    | 350     | 110     | N.D.    | 450     | N.D.    | >20      | 0.005 |
| N463A        | V5         | N.D.    | 150     | 370     | N.D.    | 700     | 100     | 400     | 600     | 320     | >20      | N.D.  |
| D477A        | C5         | 230     | N.D.    | N.D.    | N.D.    | 800     | 140     | N.D.    | 540     | 120     | >20      | 0.009 |

**SOM Figure 3: Effects of gp120 point mutations on JR-FL neutralization.** The neutralizing titers of plasmas tested against a panel of viruses bearing trimers with gp120 mutants in the JR-FL SOS background. Mutants that resulted in a >50% reduction in plasma neutralization titer are shown in red. Those that resulted in a two-fold or more increase in neutralization titer are shown in lavender. For reference purposes, the sensitivity of each mutant to V3 mAbs 39F and b12 is shown. Amino acid numbering and coloring is as described in Figure 8.
